# Supplementary material
Source: bioRxiv or medRxiv preprint supplement (https://www.biorxiv.org/highwire/filestream/73188/field_highwire_adjunct_files/4/091512-3.pdf)

**Figure S3A**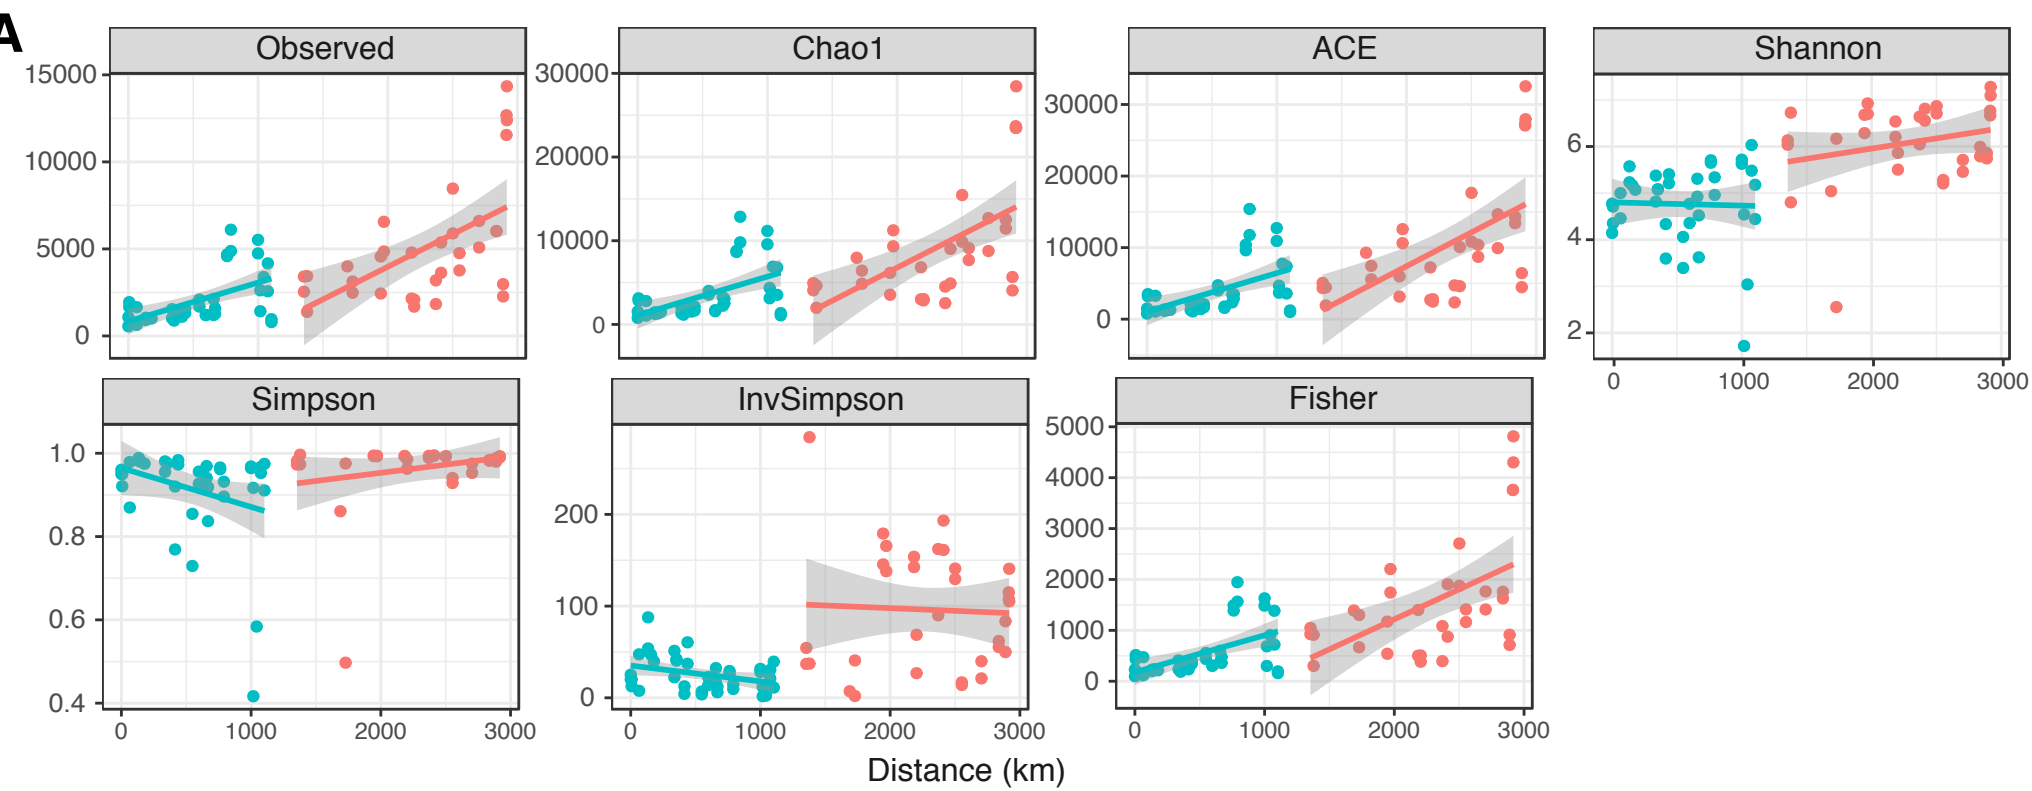**C**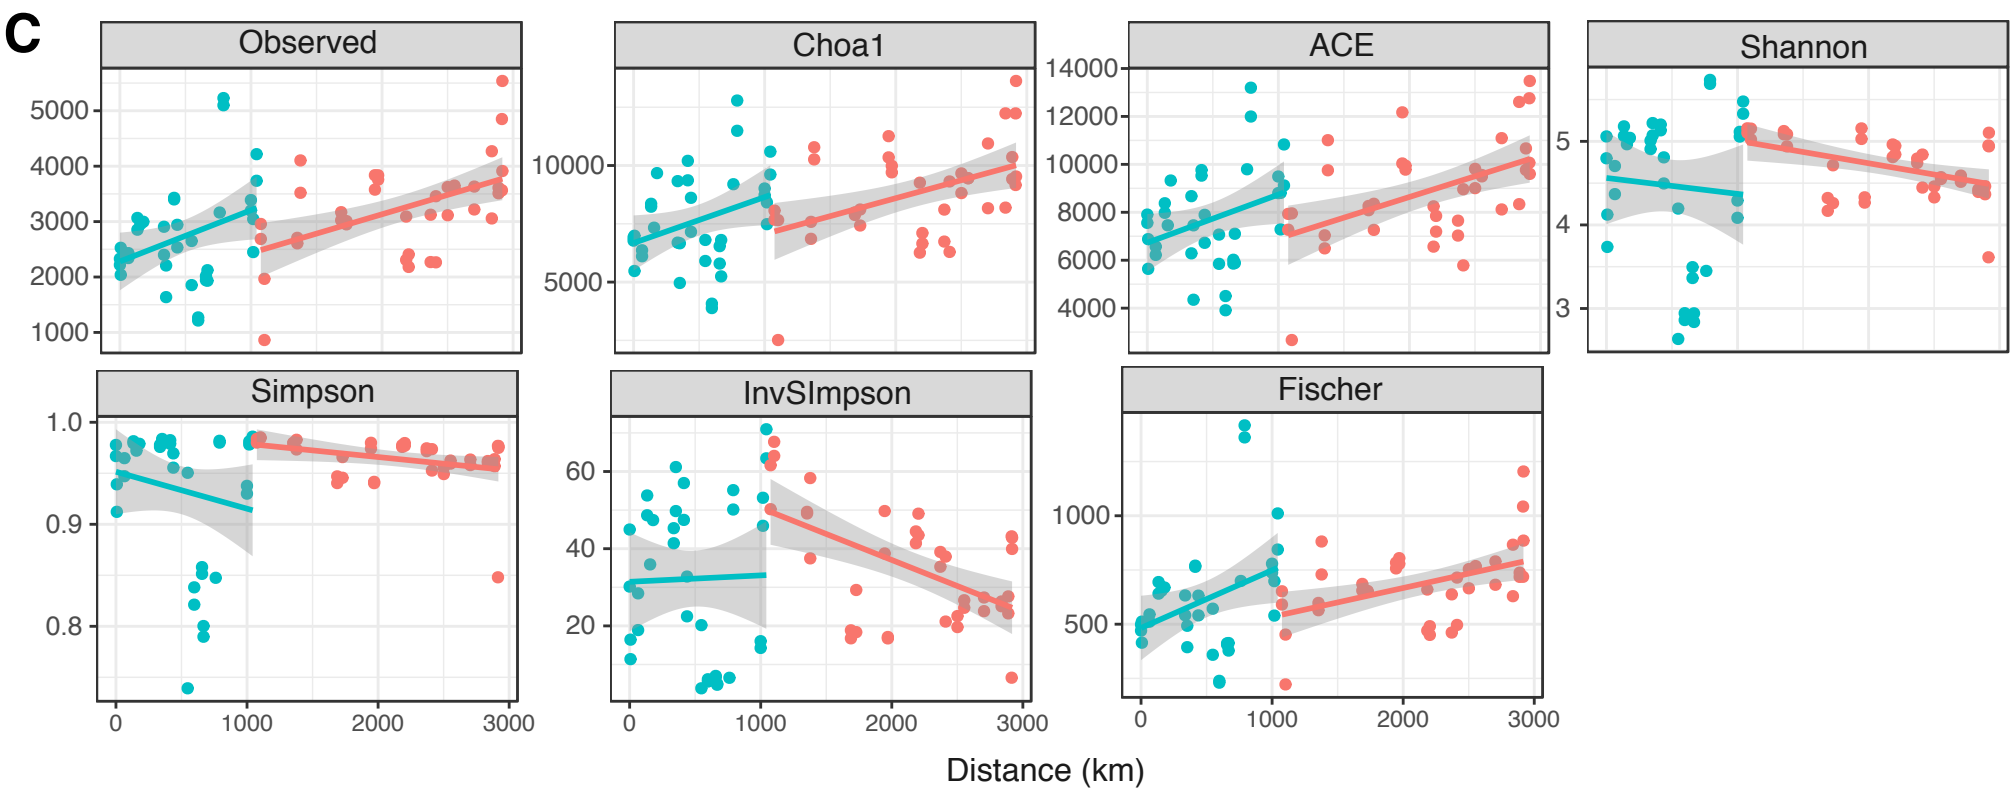**B**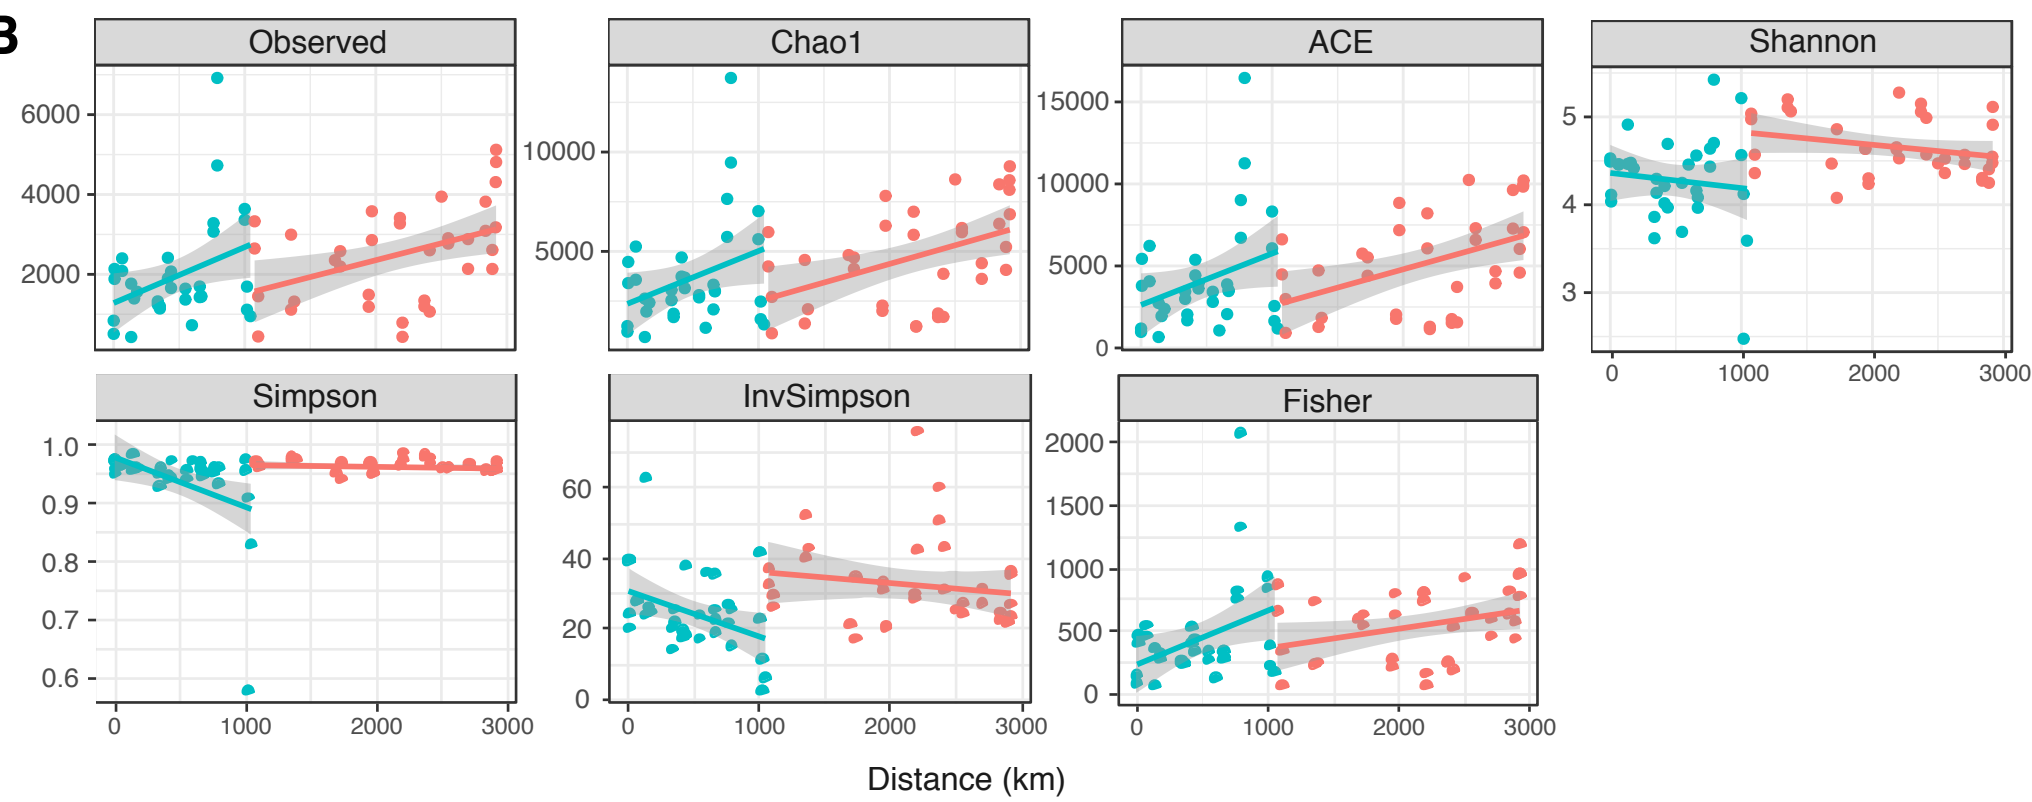**D**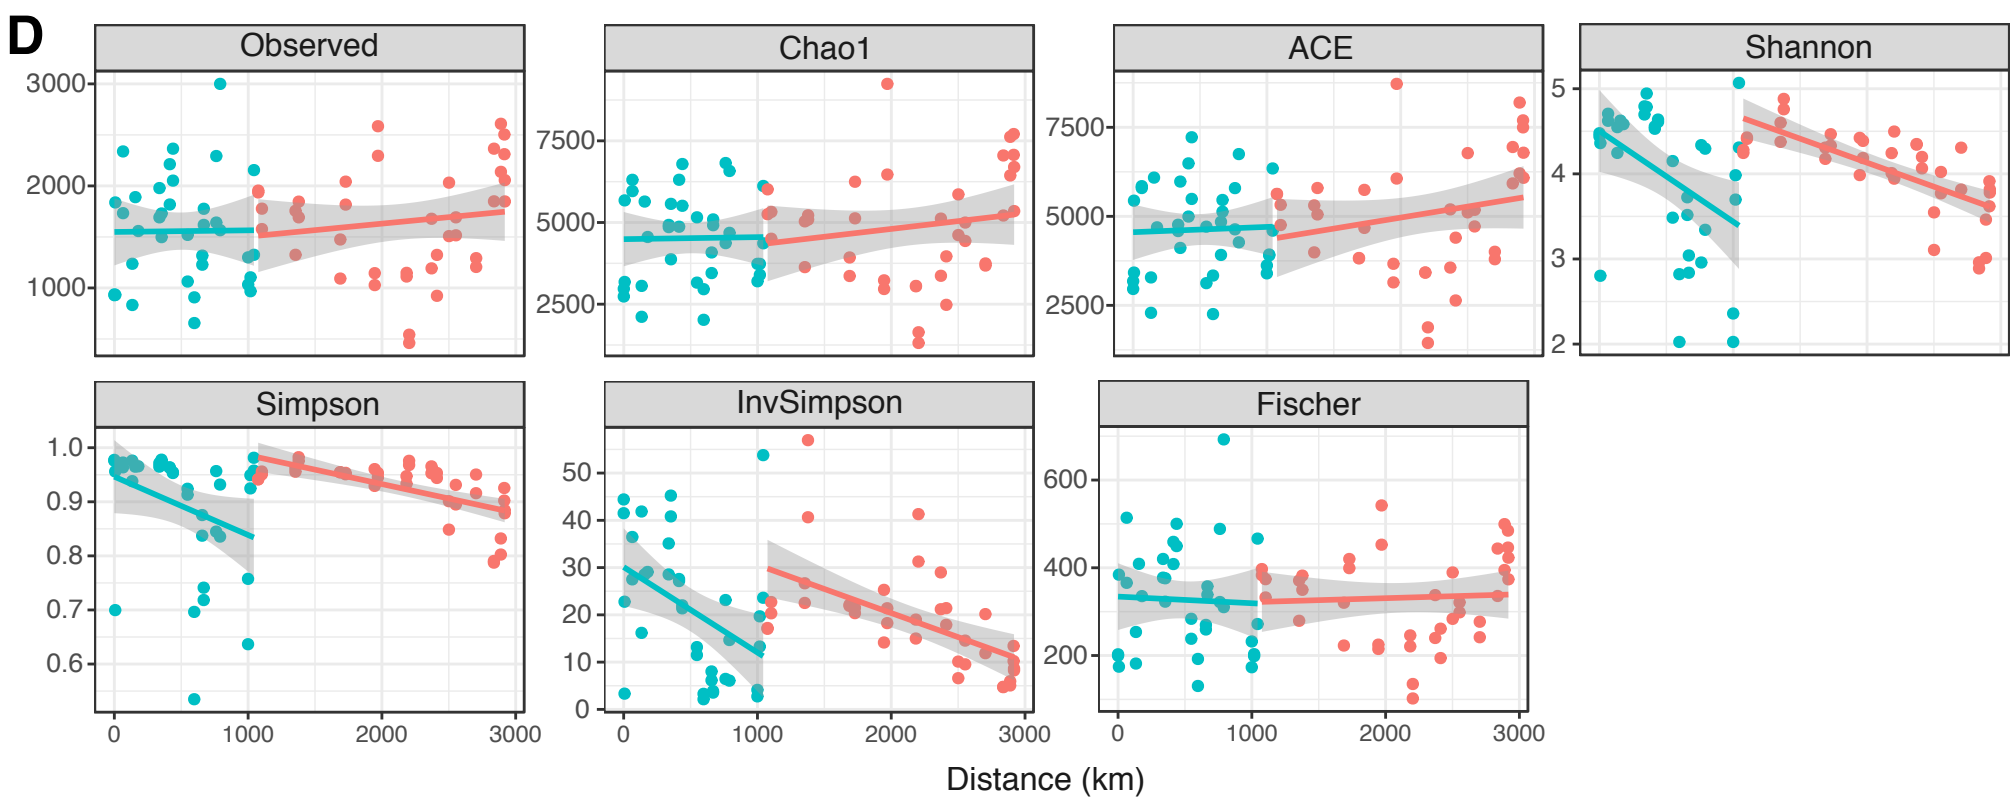

Supplement: Supplementary file [file 091512-3.pdf]
